# Supplementary figures and images for: Uptake of Helicobacter pylori Vesicles Is Facilitated by Clathrin-Dependent and Clathrin-Independent Endocytic Pathways
Source: PubMed Central journal article supplement — mBio. 2014 May 20;5(3):e00979-14. doi: 10.1128/mBio.00979-14 (PMC4030451; doi:10.1128/mbio.00979-14), 2014-05-20

Figure S1

A

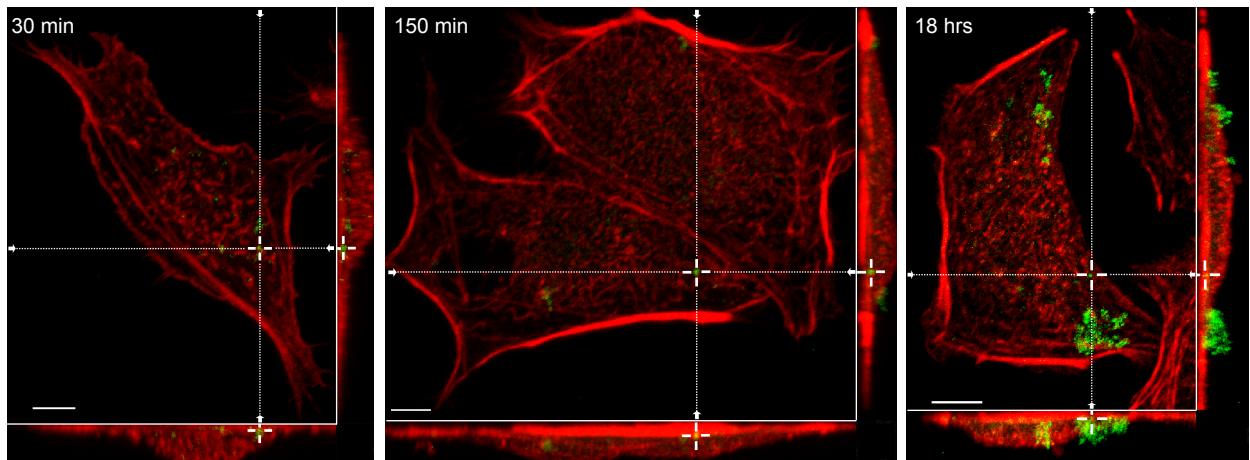

B

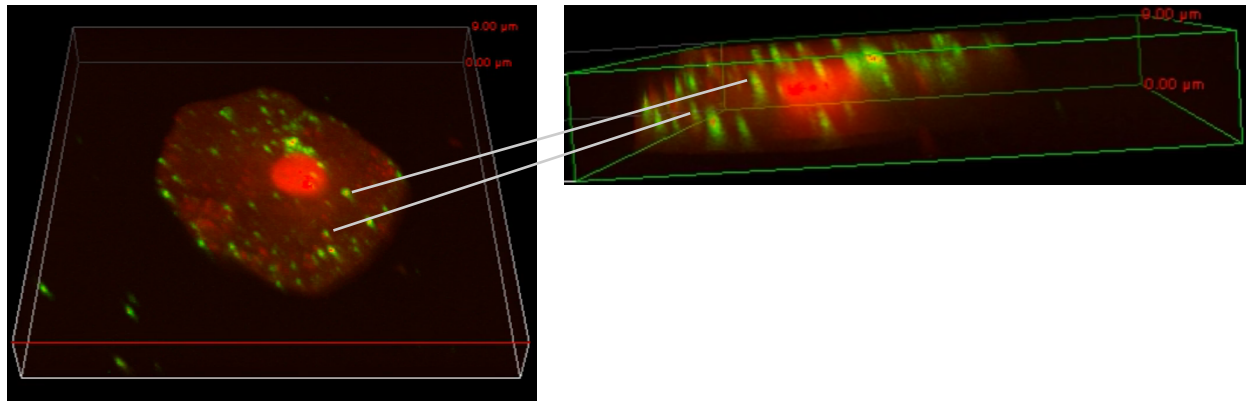

Supplement: mbo003141835sf01.pdf [file mbo003141835sf01.pdf]

Figure S2

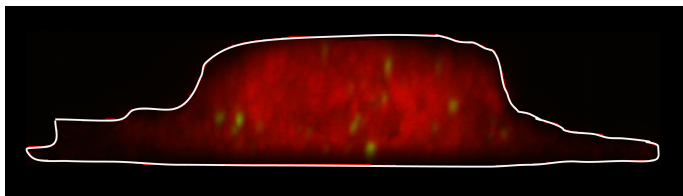

Supplement: mbo003141835sf02.pdf [file mbo003141835sf02.pdf]

# Figure S3

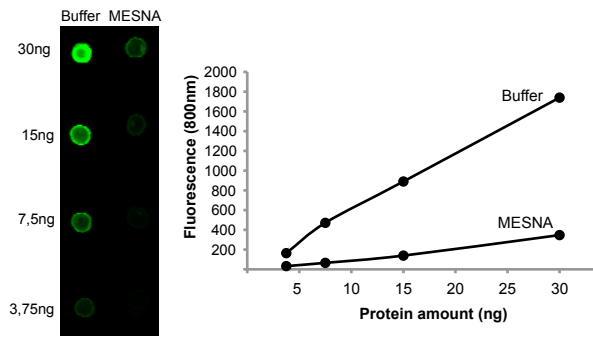

Supplement: mbo003141835sf03.pdf [file mbo003141835sf03.pdf]

Figure S4

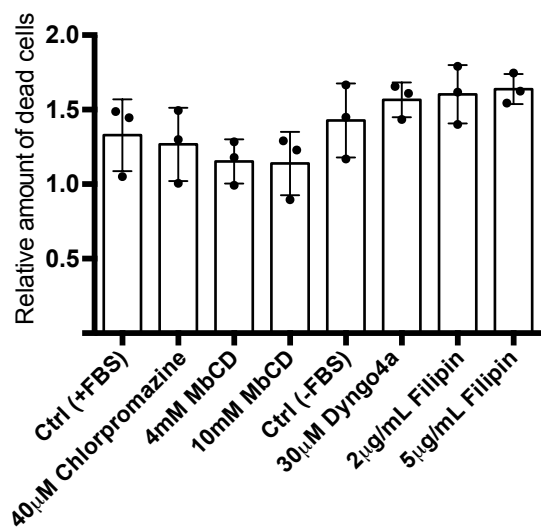

Supplement: mbo003141835sf04.pdf [file mbo003141835sf04.pdf]

Figure S5

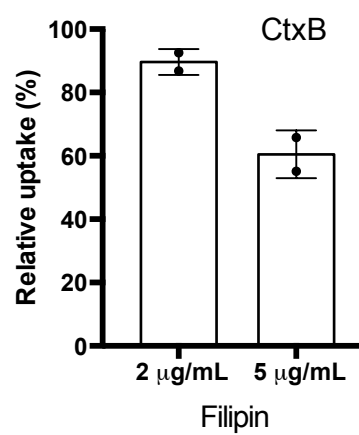

Supplement: mbo003141835sf05.pdf [file mbo003141835sf05.pdf]

Figure S6

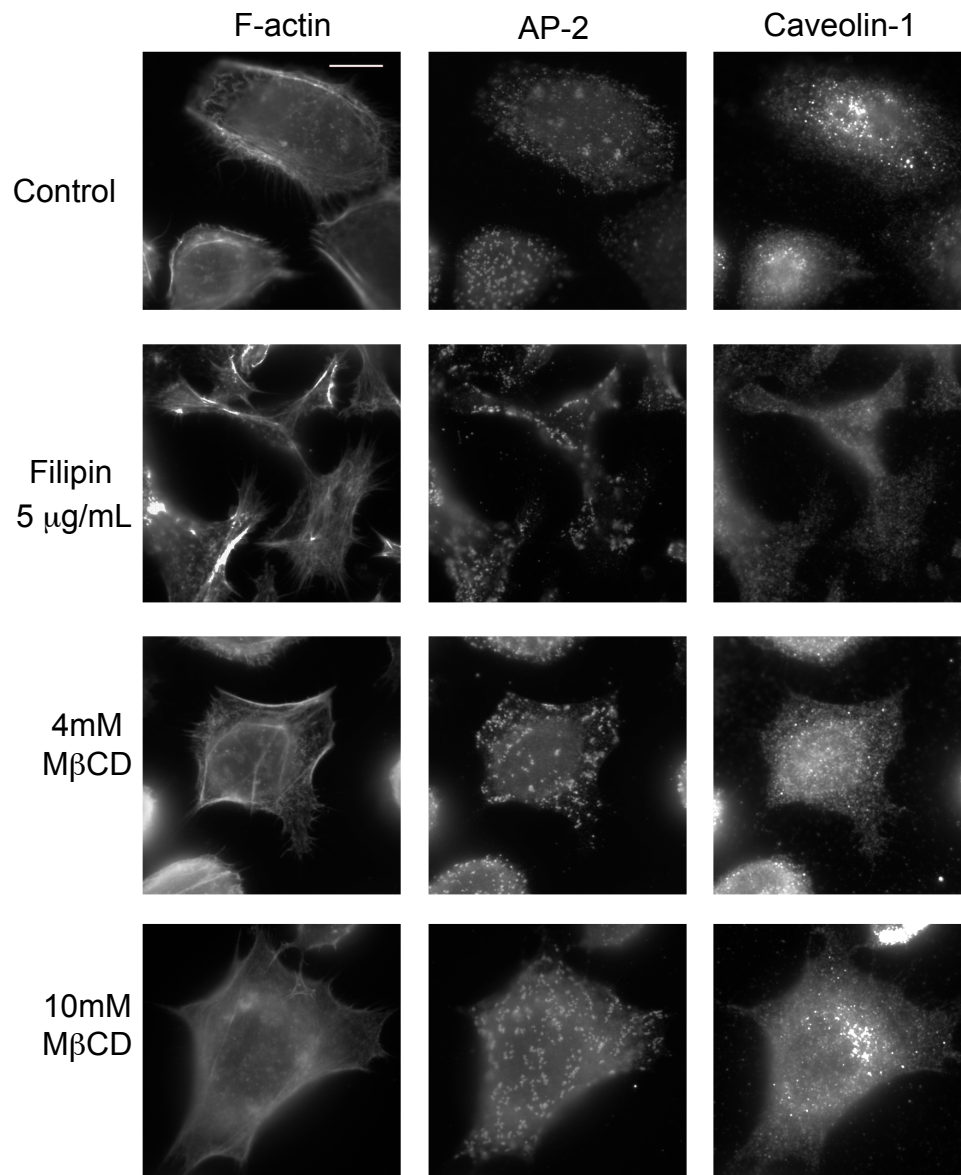

Supplement: mbo003141835sf06.pdf [file mbo003141835sf06.pdf]
